# Supplementary material for: Paradoxical low-flow phenotype in hospitalized heart failure with preserved ejection fraction
Source: PubMed Central journal article supplement — Int J Cardiol Heart Vasc. 2020 May 28;28:100539. doi: 10.1016/j.ijcha.2020.100539 (PMC7262439; doi:10.1016/j.ijcha.2020.100539), 2020-05-28
Supplement: mmc1.pdf [file mmc1.pdf]

**Supplemental Table 1. Determinants of SVI  $\leq 35\text{ml/m}^2$  in HFpEF at the time of TTE evaluation.**

|                                               | Univariate OR     | P                | Multivariate OR | P                |
|-----------------------------------------------|-------------------|------------------|-----------------|------------------|
| Age (years)                                   | 1.02 (0.99-1.04)  | 0.262            |                 |                  |
| Males (n)                                     | 0.67 (0.37-1.2)   | 0.176            |                 |                  |
| BMI (kg/m <sup>2</sup> )                      | 1.01 (0.96-1.06)  | 0.698            |                 |                  |
| Hystory of HF (n)                             | 0.91 (0.46-1.78)  | 0.776            |                 |                  |
| Hystory of AF (n)                             | 2.45 (1.36-4.41)  | <b>0.003</b>     |                 | 0.577            |
| Previous diagnosis of CA (n)                  | 2.5 (0.58-10.78)  | 0.219            |                 |                  |
| Hypertension (n)                              | 0.93 (0.47-1.84)  | 0.841            |                 |                  |
| Diabetes (n)                                  | 0.49 (0.25-0.97)  | <b>0.04</b>      |                 | 0.28             |
| CKD (n)                                       | 0.73 (0.39-1.4)   | 0.347            |                 |                  |
| CAD (n)                                       | 0.89 (0.48-1.66)  | 0.715            |                 |                  |
| COPD (n)                                      | 1.07 (0.55-2.11)  | 0.841            |                 |                  |
| NYHA class (n)                                |                   | 0.922            |                 |                  |
| SBP (mmHg)                                    | 1 (0.99-1.01)     | 0.793            |                 |                  |
| DBP (mmHg)                                    | 1.01 (0.99-1.03)  | 0.258            |                 |                  |
| GFR at admission (ml/min/1.73m <sup>2</sup> ) | 1 (0.99-1.01)     | 0.96             |                 |                  |
| High NatPs (n)                                | 1.8 (0.54-5.97)   | 0.336            |                 |                  |
| Admission-to-echo time (days)                 | 1.01 (0.96-1.07)  | 0.704            |                 |                  |
| HR during TTE (bpm)                           | 1.04 (1.01-1.06)  | <b>0.001</b>     |                 | 0.466            |
| AF during TTE (n)                             | 4.54 (2.38-8.68)  | <b>&lt;0.001</b> | 3.83 (1.86-7.9) | <b>&lt;0.001</b> |
| LVMl (g/m <sup>2</sup> )                      | 0.99 (0.98-1)     | 0.068            |                 |                  |
| LV-EF (%)                                     | 0.06 (0-8.91)     | 0.263            |                 |                  |
| Small LV cavity                               | 2.87 (1.58-5.2)   | <b>0.001</b>     | 2.4 (1.22-4.73) | <b>0.011</b>     |
| LV geometry                                   |                   | 0.212            |                 |                  |
| - Normal                                      | Referent          |                  |                 |                  |
| - Concentric remodeling                       | 1.53 (0.72-3.28)  | 0.27             |                 |                  |
| - Eccentric hypertrophy                       | 0.62 (0.25-1.49)  | 0.282            |                 |                  |
| - Concentric hypertrophy                      | 1.4 (0.65-3.02)   | 0.392            |                 |                  |
| High LV Pressure                              | 1.61 (0.81-3.21)  | 0.175            |                 |                  |
| LAVI (ml/m <sup>2</sup> )                     | 1.01 (0.99-1.03)  | 0.414            |                 |                  |
| Moderate MR (n)                               | 1.26 (0.68-2.34)  | 0.471            |                 |                  |
| Moderate AR (n)                               | 1.01 (0.37-2.78)  | 0.983            |                 |                  |
| Moderate TR (n)                               | 1.17 (0.6-2.26)   | 0.647            |                 |                  |
| Right ventricular dysfunction                 | 5.92 (2.91-12.04) | <b>&lt;0.001</b> | 4.3 (1.98-9.3)  | <b>&lt;0.001</b> |

ACEI, angiotensin-converting enzyme inhibitor; AF, atrial fibrillation; AR, aortic regurgitation; ARB, angiotensin receptor blocker; BMI, body mass index; CA, cardiac amyloidosis; CAD, coronary artery disease; CI, cardiac index; CKD, chronic kidney disease; COPD, chronic obstructive pulmonary disease; DBP, diastolic blood pressure; EF, ejection fraction; GFR, glomerular filtration rate; HF, heart failure; HFpEF, heart failure with preserved ejection fraction; HR, heart rate; LAVI, left atrial volume index; LF, low flow; LV, left ventricular; LVMl, left ventricular mass index; MR, mitral regurgitation; MRA, mineralocorticoid receptor antagonist; NF, normal flow; NatPs, natriuretic peptides; NYHA, New York Heart Association; RWT, relative wall thickness; SBP, systolic blood pressure; sPAP, systolic pulmonary artery pressure; SVI, stroke volume index; TAPSE, tricuspid annular plane systolic excursion; TR, tricuspid regurgitation; TTE, transthoracic echocardiography.

**Supplemental Table 2. Univariate Cox regression analysis with relative risk of all-cause mortality.**

|                                         | <b>HR Univariate</b> | <b>P</b> |
|-----------------------------------------|----------------------|----------|
| <b>Age (per 5 years)</b>                | 1.24 (1.1-1.41)      | 0.001    |
| <b>Male</b>                             | 1.12 (0.73-1.72)     | 0.608    |
| <b>BMI</b>                              | 0.96 (0.92-1)        | 0.044    |
| <b>AF during TTE</b>                    | 1.21 (0.77-1.9)      | 0.421    |
| <b>HR during TTE</b>                    | 1 (0.99-1.02)        | 0.963    |
| <b>SBP (per 10 mmHg)</b>                | 0.9 (0.83-0.97)      | 0.006    |
| <b>NYHA class</b>                       |                      | 0.487    |
| <b>II</b>                               | Referent             |          |
| <b>III</b>                              | 1.47 (0.54-4.03)     | 0.450    |
| <b>IV</b>                               | 0.9 (0.22-3.58)      | 0.876    |
| <b>GFR at admission (per 10ml)</b>      | 0.8 (0.72-0.89)      | <0.001   |
| <b>High NatPs</b>                       | 1.27 (0.55-2.94)     | 0.573    |
| <b>History of HF</b>                    | 1.49 (0.94-2.37)     | 0.093    |
| <b>History of AF</b>                    | 1.21 (0.79-1.87)     | 0.38     |
| <b>Hypertension</b>                     | 1.42 (0.83-2.46)     | 0.204    |
| <b>Diabetes</b>                         | 0.94 (0.58-1.52)     | 0.792    |
| <b>CKD</b>                              | 1.36 (0.86-2.15)     | 0.183    |
| <b>CAD</b>                              | 1.05 (0.67-1.66)     | 0.83     |
| <b>COPD</b>                             | 2.13 (1.35-3.36)     | 0.001    |
| <b>Beta-blockers at discharge</b>       | 1.05 (0.66-1.68)     | 0.829    |
| <b>ACEI/ARB at discharge</b>            | 0.44 (0.27-0.7)      | 0.001    |
| <b>MRA at discharge</b>                 | 1.24 (0.8-1.92)      | 0.341    |
| <b>Small LV cavity</b>                  | 0.94 (0.61-1.46)     | 0.787    |
| <b>LV geometry</b>                      |                      | 0.318    |
| - Normal                                | Referent             |          |
| - Concentric remodeling                 | 1.56 (0.87-2.8)      | 0.138    |
| - Eccentric hypertrophy                 | 1.17 (0.61-2.24)     | 0.639    |
| - Concentric hypertrophy                | 1.61 (0.91-2.88)     | 0.105    |
| <b>LV-EF</b>                            | 2.8 (0.06-121.62)    | 0.593    |
| <b>High LV Pressure</b>                 | 1.39 (0.83-2.32)     | 0.209    |
| <b>Moderate MR</b>                      | 1.16 (0.73-1.84)     | 0.522    |
| <b>Moderate AR</b>                      | 1.13 (0.55-2.35)     | 0.74     |
| <b>Moderate TR</b>                      | 2.09 (1.33-3.28)     | 0.001    |
| <b>LF (SVI &lt;30 ml/m<sup>2</sup>)</b> | 3.58 (2.29-5.58)     | <0.001   |
| <b>Low TAPSE/sPAP (&lt;0.36mm/mmHg)</b> | 3.02 (1.93-4.72)     | <0.001   |
| <b>≥ 2 LF determinants</b>              | 1.74 (1.11-2.71)     | 0.015    |
| <b>LF score ≥ 3</b>                     | 2.45 (1.54-3.89)     | <0.001   |

Abbreviations as in supplemental table 1.

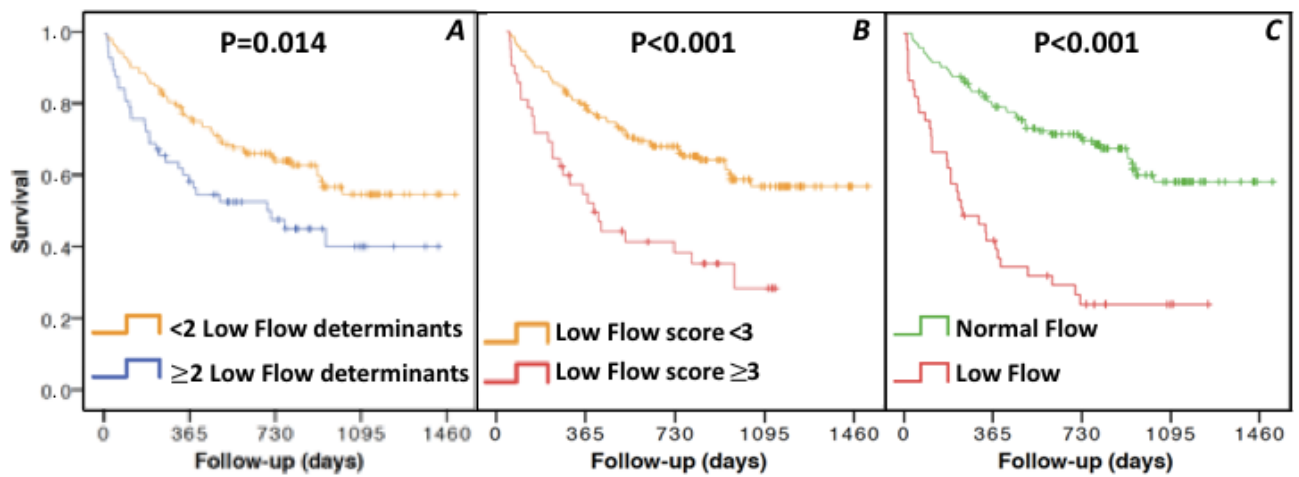

Number at risk

|     |    |    |    |   |     |     |    |    |   |     |     |    |    |   |
|-----|----|----|----|---|-----|-----|----|----|---|-----|-----|----|----|---|
| 135 | 96 | 64 | 24 | 1 | 151 | 109 | 71 | 27 | 1 | 148 | 110 | 73 | 28 | 1 |
| 58  | 32 | 19 | 7  | 0 | 42  | 19  | 12 | 4  | 0 | 45  | 18  | 9  | 2  | 0 |

**Supplemental Figure 1.** Kaplan-Meier survival curves according to number of Low Flow determinants (A), Low Flow score (B), and direct echocardiographic assessment of Low Flow (C).
